# Supplementary material for: Using non-exceedance probabilities of policy-relevant malaria prevalence thresholds to identify areas of low transmission in Somalia
Source: Malar J. 2018 Feb 20;17:88. doi: 10.1186/s12936-018-2238-0 (PMC5819647; doi:10.1186/s12936-018-2238-0)
Supplement: Supplementary file 1 — Additional file 1. Model formulation and validation. [file 12936_2018_2238_MOESM1_ESM.docx]

**Additional file 1**

***1.1 Model formulation***

Let *Yit* denote the number of positive microscopy tests for *Plasmodium falciparum* out of *nit* in a community at location *xi* and year *ti*. We assume that conditionally on a Gaussian random effect, *W(xi,ti)*, the *Yit* are mutually independent Binomial variables with number of trials *nit* and probability of a positive microscopy test *p(xi,ti)* such that

where: *ait* and *Ait* are the minimum and maximum age among the sampled individuals at location *xi* and year *ti*, respectively; *f* and *g* are linear splines, with knots at 3 and 10 years for *f* and at 80 years for *g*. We model the random effects as

where *S(x,t)* is a zero-mean stationary and isotropic spatio-temporal Gaussian process with variance σ2 and *Z(x,t)* isGaussian noise with variance τ2. We interpret *S(x,t)* as the cumulative effect of unmeasured spatio-temporal risk factors for *P. falciparum* that accounts for extra-binomial variation between the sampled communities; *Z(x,t)*, instead,is an unstructured component that accounts for unexplained extra-binomial variation within communities (e.g. genetic variation).

We use a spatio-temporal correlation function of the Gneiting family [2], given by the following expression

where *δ* and *φ* are scale parameters that regulates how fast the temporal and spatial correlations decay to 0, respectively.

Estimation of the model parameters is carried out using Monte Carlo maximum likelihood [1].

***1.2 The empirical spatio-temporal variogram***

Let denote the set of observations such that and . The empirical spatio-temporal variogram (ESTV) is defined as

where is the number of observations within and is a point estimate of from a model that assume the absence of any extra-binomial spatio-temporal variation, i.e. *S(x,t)=0* for all *x* and *t*.

***1.3 Testing the presence of residual spatio-temporal correlation***

To justify the need of modelling the data using a geostatistical approach, we test the hypothesis on the presence of residual spatio-temporal correlation in the data. To pursue this objective, we then use the following iterative algorithm.

1. Obtain a point estimate of, say, at each of the observed locations *xi* and years *ti*, from a model that assume the absence of any residual spatio-temporal correlation, i.e. *S(x,t)=0* for all *x* and *t*.
2. Permute the order of the data, including, while holding fixed.
3. Compute the ESVM, as defined in the previous section.
4. Repeat 2 and 3 a large enough number of times, say *B*.
5. Use the resulting *B* empirical variograms to generate 95% tolerance intervals at each of the pre-defined distance bins.

If the ESVM obtained from the original, unpermuted data, lies outside these intervals, then the data show evidence of residual spatio-temporal correlation.

Figure SI-1 shows that the ESVM from the original data lies out the 95% tolerance intervals for time separations up to 2 years. However, the ESVM lies inside these intervals for time bins above 2 years, indicating a weak correlation between data points that are sampled more than 2 years apart.

***1.4 Model validation***

In order to check the validity of the chosen spatio-temporal covariance function, we modify the Monte Carlo algorithm introduced in the previous section by replacing step 2 with following.

2*. Simulate, at each of the observed locations *xi* and years t, from its marginal multivariate Gaussian distribution under the assumed model. Conditionally on the simulated values of, simulate binomial data *yit*, corresponding to the counts positive of positive microscopy tests. Finally, compute the point estimates using the simulated data.

In this case, the resulting 95% tolerance band of the ESTV is generated under the assumption that the true covariance function for exactly corresponds to the one adopted in the analysis. If the ESVM obtained from the original data lies outside these intervals, then the data show evidence that the adopted spatio-temporal covariance function is not appropriate. If, instead, the ESVM from the data lies within the 95% tolerance band, we then conclude that the adopted covariance function is compatible with the data.

Figure SI-2 shows that the ESTV lies well within the 95% tolerance interval generated by the algorithm. This indicates that the data do not show evidence against the fitted spatio-temporal correlation function.


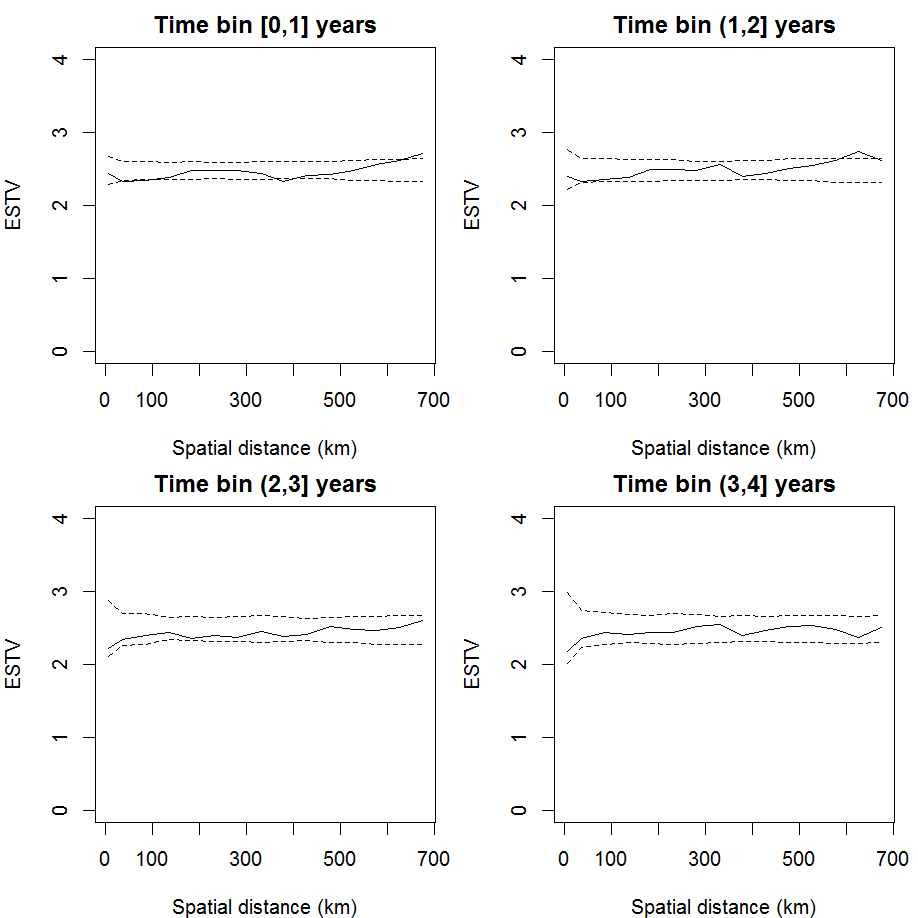


**Figure SI-1.** The solid line in each panel show the empirical spatio-temporal variogram (ESTV), defined in SI1, at four different time lags. The dashed lines represent the 95% confidence intervals generated under the hypothesis of spatio-temporal independence. At time lags of [0,1] and (1,2] years, the ESTV lies partly outside the 95% bandwidth, which is evidence of residual spatio-temporal correlation at the those time separations.


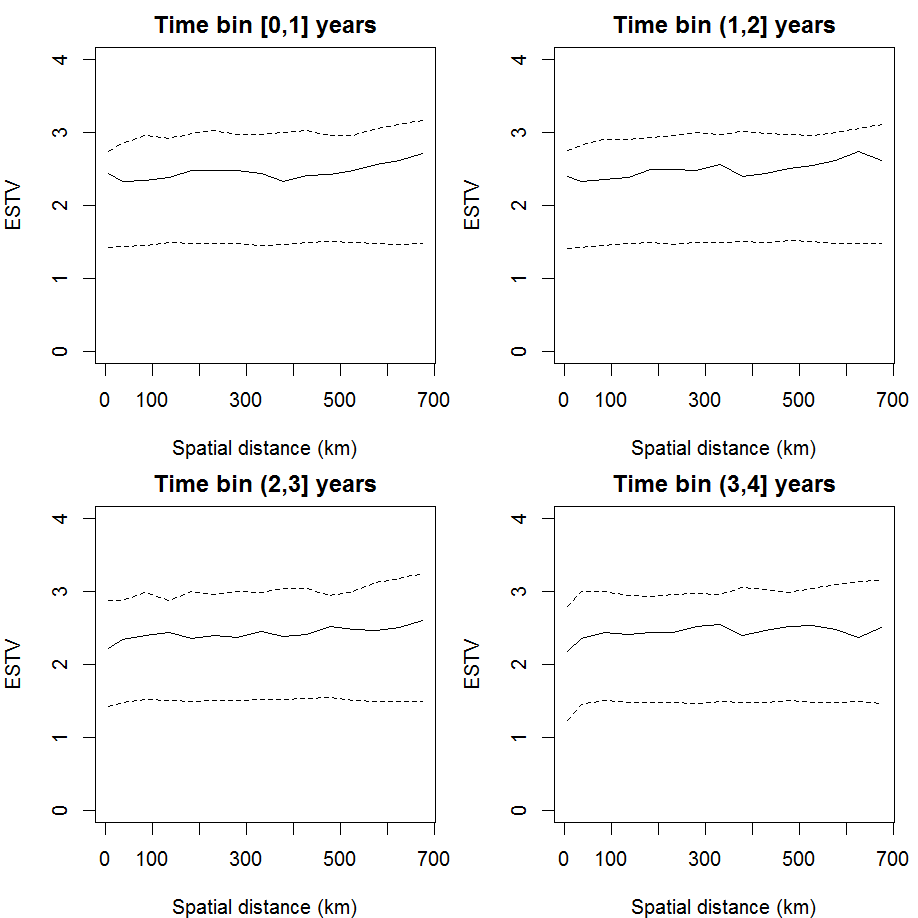


**Figure SI-2.** The solid line in each panel show the empirical spatial spatio-temporal variogram (ESTV), defined in SI1, at four different time lags. The dashed lines represent the 95% confidence intervals generated under the hypothesis that the fitted spatio-temporal covariance function correspond to the true covariance function that generated the data. At any of the four time lags, the ESTV falls within the 95% bandwidth, which is evidence that the adopted covariance function is compatible with the data.

**References**

1. Christensen OF (2004). Monte Carlo maximum likelihood in model-based geostatistics. *Journal of Computational and Graphical Statistics,* **13**: 702-718
2. Gneiting T (2002). Nonseparable, Stationary Covariance Functions for Space-Time Data. *Journal of the American Statistical Association,* **97**: 590-600
